# Supplementary material
Source: PubMed Central journal article supplement (PMC5623143)
Supplement: NIHMS893411-supplement.pdf [file NIHMS893411-supplement.pdf]

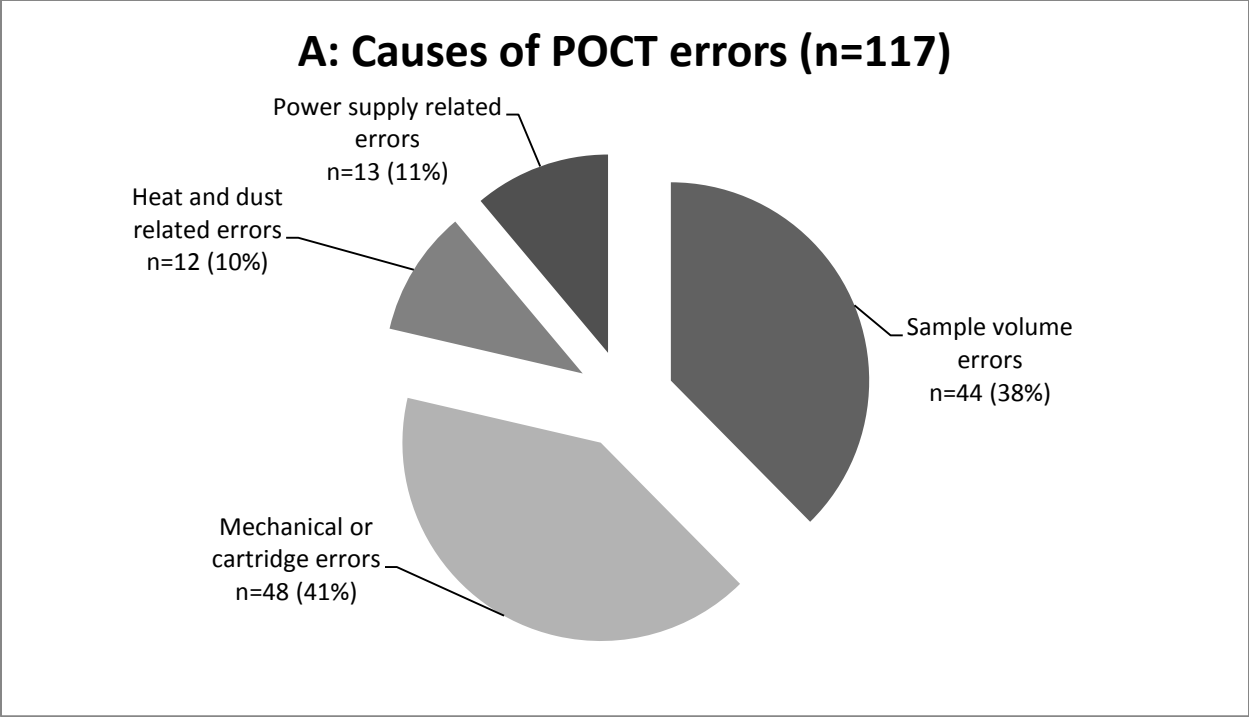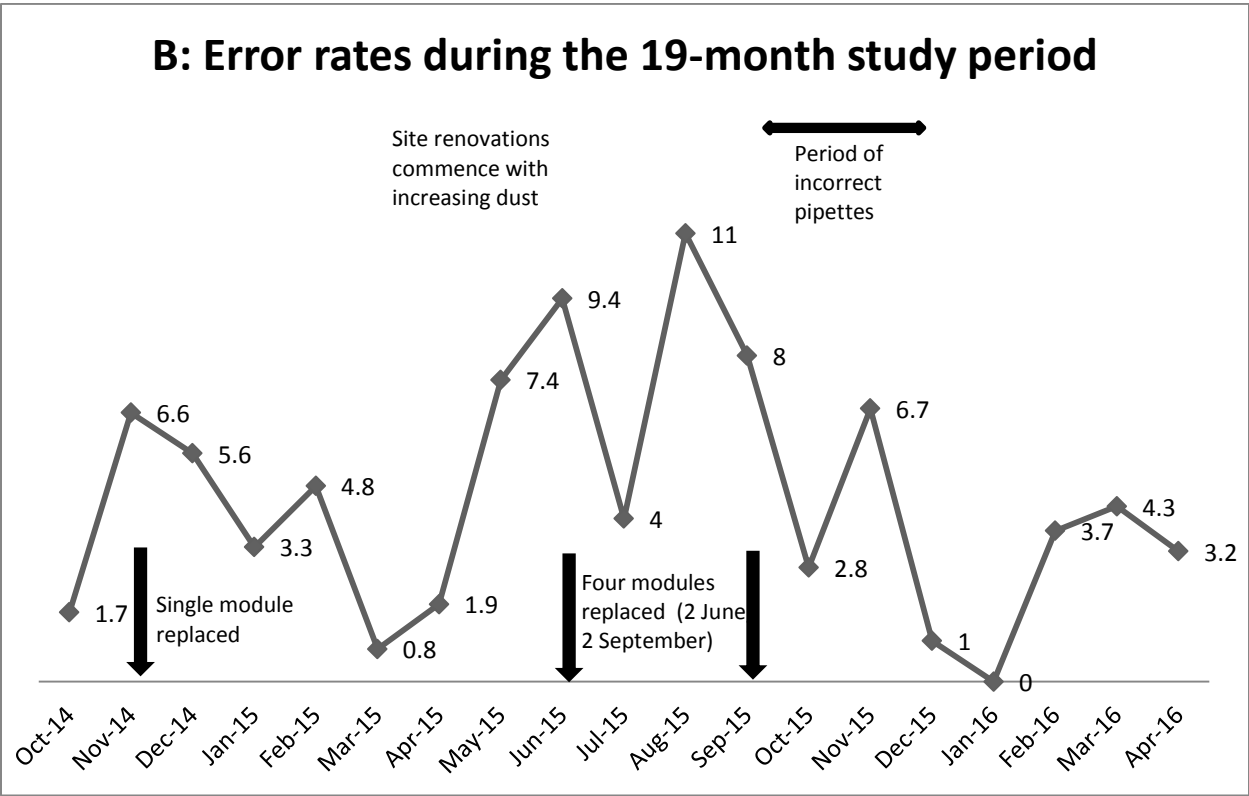

**Supplementary Figure 1: A) Causes of HIV Point of Care Testing (POCT) errors and B) error rates during the study period.**
